# Supplementary figures and images for: Thrixopelma nadineae, a New Theraphosine from Ecuador (Araneae: Theraphosidae)
Source: MDPI journal article supplement (doi:10.3390/taxonomy2030020), 2022-06-24

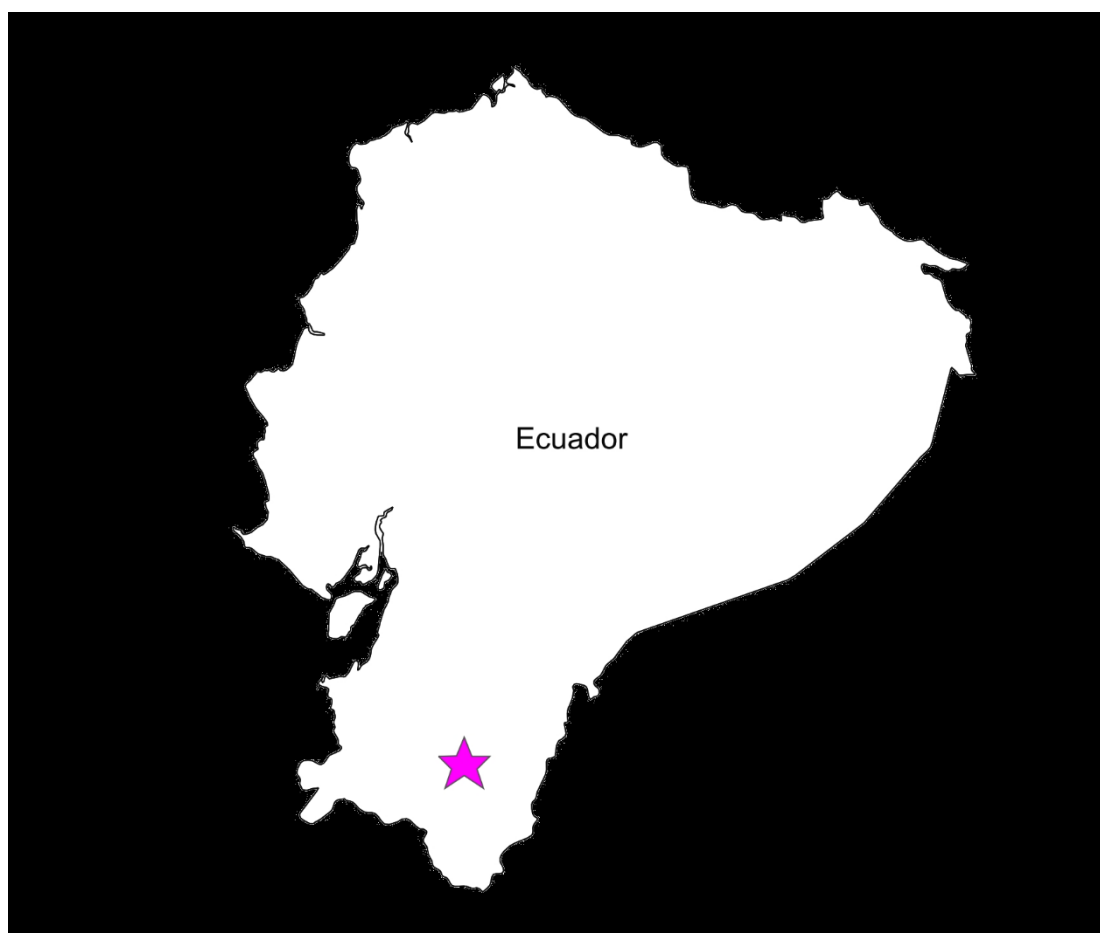

**Figure S1.** Map showing the type locality of *Thrixopelma nadineae* sp. nov. (pink star).

Supplement: s1 [file s1]
